# Supplementary material
Source: HighWire-hosted journal article supplement (http://qhc.bmj.com/highwire/filestream/147360/field_highwire_adjunct_files/0/Appendix_1_web_only.pdf)
Supplement: Appendix_1_web_only.pdf [file Appendix_1_web_only.pdf]

## Appendix 1. Standardised mortality review form

|                                                                                                                                                                                                                                                                                                                                                                                                                                                                                                                                                                                                                                                                                                                                                                                                                                                                                                                                                                                                                                            |                                           |                                          |                                                          |
|--------------------------------------------------------------------------------------------------------------------------------------------------------------------------------------------------------------------------------------------------------------------------------------------------------------------------------------------------------------------------------------------------------------------------------------------------------------------------------------------------------------------------------------------------------------------------------------------------------------------------------------------------------------------------------------------------------------------------------------------------------------------------------------------------------------------------------------------------------------------------------------------------------------------------------------------------------------------------------------------------------------------------------------------|-------------------------------------------|------------------------------------------|----------------------------------------------------------|
| <b>Date of M&amp;M meeting</b>                                                                                                                                                                                                                                                                                                                                                                                                                                                                                                                                                                                                                                                                                                                                                                                                                                                                                                                                                                                                             |                                           | <b>Case number</b>                       |                                                          |
| Date of Admission (DOA)                                                                                                                                                                                                                                                                                                                                                                                                                                                                                                                                                                                                                                                                                                                                                                                                                                                                                                                                                                                                                    |                                           | Date of death (DOD)                      |                                                          |
| Case category                                                                                                                                                                                                                                                                                                                                                                                                                                                                                                                                                                                                                                                                                                                                                                                                                                                                                                                                                                                                                              | <input type="radio"/> Mortality           | <input type="radio"/> Morbidity          |                                                          |
| Mode of admission                                                                                                                                                                                                                                                                                                                                                                                                                                                                                                                                                                                                                                                                                                                                                                                                                                                                                                                                                                                                                          | <input type="radio"/> Emergency admission | <input type="radio"/> Elective admission |                                                          |
| Clinical summary                                                                                                                                                                                                                                                                                                                                                                                                                                                                                                                                                                                                                                                                                                                                                                                                                                                                                                                                                                                                                           |                                           |                                          |                                                          |
| Was the death certificate accurate?                                                                                                                                                                                                                                                                                                                                                                                                                                                                                                                                                                                                                                                                                                                                                                                                                                                                                                                                                                                                        |                                           | <input type="checkbox"/> yes             | <input type="checkbox"/> no                              |
| Was the patient receiving palliative care?                                                                                                                                                                                                                                                                                                                                                                                                                                                                                                                                                                                                                                                                                                                                                                                                                                                                                                                                                                                                 |                                           | <input type="checkbox"/> N/A             | <input type="checkbox"/> yes <input type="checkbox"/> no |
| Were they on an end of life care pathway?                                                                                                                                                                                                                                                                                                                                                                                                                                                                                                                                                                                                                                                                                                                                                                                                                                                                                                                                                                                                  |                                           | <input type="checkbox"/> N/A             | <input type="checkbox"/> yes <input type="checkbox"/> no |
| Were there any issues of care in the treatment of this patient? ( <i>Identify below</i> )                                                                                                                                                                                                                                                                                                                                                                                                                                                                                                                                                                                                                                                                                                                                                                                                                                                                                                                                                  |                                           | <input type="checkbox"/> yes             | <input type="checkbox"/> no                              |
| Did any of these issues contribute to, or have an impact on outcome?                                                                                                                                                                                                                                                                                                                                                                                                                                                                                                                                                                                                                                                                                                                                                                                                                                                                                                                                                                       |                                           | <input type="checkbox"/> yes             | <input type="checkbox"/> no                              |
| If the patient died, was the death avoidable?                                                                                                                                                                                                                                                                                                                                                                                                                                                                                                                                                                                                                                                                                                                                                                                                                                                                                                                                                                                              |                                           | <input type="checkbox"/> yes             | <input type="checkbox"/> no                              |
| <b>Identify contributory factors:</b> <ul style="list-style-type: none"> <li><input type="radio"/> Documentation</li> <li><input type="radio"/> Unanticipated complication in procedure</li> <li><input type="radio"/> Delay in diagnosis or diagnosis not suspected</li> <li><input type="radio"/> Delay in procedure</li> <li><input type="radio"/> Delay in clinical review /actions</li> <li><input type="radio"/> Delay in transfer within hospital</li> <li><input type="radio"/> Delay in transfer between hospitals</li> <li><input type="radio"/> Communication issues</li> <li><input type="radio"/> Drug error - prescription</li> <li><input type="radio"/> Drug error – administration</li> <li><input type="radio"/> Failure to rescue deteriorating patient</li> <li><input type="radio"/> Avoidable infection</li> <li><input type="radio"/> Problems following established protocol</li> <li><input type="radio"/> Training issues</li> <li><input type="radio"/> Resource issues (staffing/ bed availability)</li> </ul> |                                           | <b>Comments:</b>                         |                                                          |
| <b>Actions to take forward</b>                                                                                                                                                                                                                                                                                                                                                                                                                                                                                                                                                                                                                                                                                                                                                                                                                                                                                                                                                                                                             |                                           |                                          |                                                          |

|                                                                                                                                                                                                                                                                                             |                                                                                                                                                                                             |
|---------------------------------------------------------------------------------------------------------------------------------------------------------------------------------------------------------------------------------------------------------------------------------------------|---------------------------------------------------------------------------------------------------------------------------------------------------------------------------------------------|
| <p><b>Addressed to:</b></p> <ul style="list-style-type: none"> <li>○ Clinical team</li> <li>○ Another clinical team</li> <li>○ Risk &amp; Governance Meeting</li> <li>○ Other Management meeting</li> <li>○ Risk office</li> <li>○ Safety Monitoring Committee</li> <li>○ PCT/GP</li> </ul> | <p><b>Who to take forward</b></p>                                                                                                                                                           |
| <p><b>Impact of issues on outcome</b></p> <ul style="list-style-type: none"> <li>○ No impact</li> <li>○ <b>Green</b></li> <li>○ <b>Amber</b></li> <li>○ <b>Red</b></li> </ul>                                                                                                               | <p><b>Adverse Incident</b></p> <ul style="list-style-type: none"> <li>○ Yes</li> <li>○ No</li> <li>○ Already reported</li> <li>○ Serious Adverse Incident investigation underway</li> </ul> |
